# Supplementary material for: Learning by drawing: understanding the potential of comics-based courses in medical education through a qualitative study
Source: Springer Nature journal article supplement (doi:10.1186/s12909-025-07120-y), 2025-04-17
Supplement: MOESM1 [file 12909_2025_7120_MOESM1_ESM%20.docx]

**Interview for Students of Graphic Medicine**

*Begin recording.*

*Hello, I am [Alice/Veronica] from the Graphic Medicine study team.*

*Because this is a research study, I will need to read a brief statement and then have you confirm verbally your interest to continue with this interview.*

*You are being invited to volunteer to participate in a research study. Research studies include only people who voluntarily choose to take part.*

*You have the right to ask any questions you may have about this research. If you have questions, complaints or concerns or believe you may have been harmed from participating in this research, you should contact Michael J. Green, MD, MS at 717.531.7887. If you have questions regarding your rights as a research subject or concerns regarding your privacy, you may contact the research protection advocate in the HMC Human Subjects Protection Office at 717-531-5687. You may call this number to discuss any problems, concerns or questions; get information or offer input.*

*You do not have to participate in this research. Taking part in the research study is voluntary. Your decision to participate or to decline the research will not result in any penalty or loss of benefits to which you are entitled.*

*Tell the researcher your decision regarding whether or not to participate in the research. (Participant must verbally confirm before moving forward with interview questions.)*

**Section A. Demographics:**

- Training status (first year, second year, third year, fourth year)
- Age
- Gender
- Medical school

**Section B. Information about the course:**

- When did you take this course?
- Where did you take the course?
- Describe the course logistics (how often you met, how many sessions, duration of each session, how many students in the class etc)
- Was this course in-person or on-line?

**Section C. COVID**

- Did you take the course during the Covid-19 pandemic?
  - If so, was it online?
- What do you consider to be the main characteristics of an online course?
- In your opinion what is the role of graphic medicine during the pandemic?

**Section D. Description of the experience**

- Please talk about your experience with the course (focusing on the rewards and challenges)
- What did you like most and least about?
  - Reading and discussing comics
  - Making comics
- How (if at all) are comics and graphic novels useful for visually expressing your experiences?
- What was most meaningful for you about this course?

**Section E. The impact of the experience on learning:**

- Describe ways this course was relevant to your medical education
  - Skills that you learned
  - Impact it had on how you interact with or relate to patients and families
  - Impact on your own professional growth and self-reflection
- What is your medical area of specialty?
  - Did this course influence your choice of specialty?
- Do you consider teaching with comics to be useful and why?

**Section F. Ongoing experience with comics**:

- Do you use comics or drawing in your current work?
  - If so, please say more about this
  - If not, why not?
- Do you anticipate making/reading/using comics in your future work?

**Section G. Potential of Graphic medicine**

- Please discuss the relevance of Graphic Medicine to your medical training (e.g. does it help facilitate the physician/patient relationship, the physician's self-perception as a professional, and/or the different points of view)?
- For which diseases can Graphic Medicine express its best potential? (e.g. rare/common, acute/chronic, psychiatric, oncological, neurodegenerative, infection, cardiovascular and so on...). And why?

**Section H. Final question:**

- Anything else you would like to say about your experience with comics and medicine?
